# Supplementary material
Source: publisher figshare collection journal article supplement (https://karger.figshare.com/ndownloader/files/26540381)
Supplement: Supplementary file 1 [file 26540381]

Supplemental Digital Appendix 2

| MERSQI scores by Author-1 | | | | | | | | | | | |
| --- | --- | --- | --- | --- | --- | --- | --- | --- | --- | --- | --- |
| Source | SD | S-I | S-RR | TD | V-IS | V-C | V-ROV | DA-AA | DA-CA | O | **Total** |
| Etkin and Cuthbert (2014) | 1.5 | 0.5 | 0.5 | 1 | 0 | 1 | 1 | 1 | 2 | 1 | **9.5** |
| Fiorillo et al. (2016)  Luciano et al. (2015)  Sampgona et al. (2014) | 1 | 1.5 | 1.5 | 1 | 0 | 1 | 1 | 1 | 1 | 1 | **10** |
| Kirmayer et al. (2008) | 1 | 0.5 | 0.5 | 1 | 0 | 1 | 0 | 1 | 1 | 1 | **7** |
| Nikapota (2008) | 1 | 0.5 | 0.5 | 3 | 0 | 0 | 0 | 1 | 1 | 3 | **10** |
| Santos et al. (2007) | 2 | 0.5 | 0.5 | 3 | 0 | 1 | 1 | 1 | 1 | 1.5 | **11.5** |
| Shea et al. (1989 & 2007) | 1.5 | 0.5 | 1.5 | 3 | 0 | 1 | 1 | 1 | 1 | 2 | **12.5** |
| Shea et al. (2007) | 2 | 0.5 | 0.5 | 3 | 0 | 1 | 1 | 1 | 1 | 2 | **12** |
| Stein (1975) | 2 | 0.5 | 1.5 | 3 | 1 | 1 | 1 | 1 | 2 | 2 | **15** |
| Taylor and Vaidya (2005) | 1 | 1.5 | 0.5 | 1 | 0 | 0 | 1 | 1 | 1 | 1 | **8** |
| Valdivieso et al. (2016) | 1.5 | 0.5 | 1.5 | 3 | 0 | 0 | 1 | 1 | 2 | 1.5 | **12** |
| Willmuth and McKegney (1977) | 1.5 | 0.5 | 1.5 | 3 | 0 | 0 | 1 | 1 | 1 | 2 | **11.5** |
| Yates, (1996) | 1 | 0.5 | 0.5 | 1 | 0 | 0 | 1 | 1 | 1 | 1 | **7** |
| MERSQI scores by Author-2 | | | | | | | | | | | |
| Article | SD | S-I | S-RR | TD | V-IS | V-C | V-ROV | DA-AA | DA-CA | O | **Total** |
| Etkin and Cuthbert (2014) | 1.5 | 0.5 | 0.5 | 1 | 0 | 1 | 1 | 1 | 2 | 1 | **9.5** |
| Fiorillo et al. (2016)  Luciano et al. (2015)  Sampgona et al. (2014) | 1 | 1.5 | 1.5 | 1 | 0 | 1 | 1 | 1 | 1 | 1 | **10** |
| Kirmayer et al. (2008) | 1 | 0.5 | 0.5 | 1 | 0 | 1 | 1 | 1 | 1 | 1 | **8** |
| Nikapota (2008) | 1 | 0.5 | 0.5 | 3 | 0 | 0 | 1 | 1 | 1 | 1.5 | **9.5** |
| Santos et al. (2007) | 2 | 0.5 | 0.5 | 3 | 0 | 1 | 1 | 1 | 1 | 2 | **12** |
| Shea et al. (1989 & 2007) | 1.5 | 0.5 | 1.5 | 3 | 0 | 1 | 1 | 1 | 1 | 2 | **12.5** |
| Shea et al. (2007) | 2 | 0.5 | 0.5 | 3 | 0 | 1 | 1 | 1 | 1 | 2 | **12** |
| Stein (1975) | 2 | 0.5 | 1.5 | 3 | 1 | 1 | 1 | 1 | 2 | 2 | **15** |
| Taylor and Vaidya (2005) | 1 | 1.5 | 0.5 | 1 | 0 | 0 | 1 | 1 | 1 | 1 | **8** |
| Valdivieso et al. (2016) | 1.5 | 0.5 | 1.5 | 3 | 0 | 0 | 1 | 1 | 2 | 1.5 | **12** |
| Willmuth and McKegney (1977) | 1.5 | 0.5 | 1.5 | 3 | 0 | 1 | 1 | 1 | 1 | 2 | **12.5** |
| Yates, (1996) | 1 | 0.5 | 0.5 | 1 | 0 | 0 | 1 | 1 | 1 | 1 | **7** |

SD: study design

S-I: sampling (number of institutions)

S-RR: sampling (response rate)

TD: type of data

V-IS: validity of evaluation instrument (internal structure)

V-C: validity of evaluation instrument (content)

V-ROV: validity of evaluation instrument (relationship to other variables)

DA-AA: data analysis (appropiateness of analysis)

DA-CA: data analysis (complexity of analysis)

O: Outcomes
